# Supplementary material for: BrEPS: a flexible and automatic protocol to compute enzyme-specific sequence profiles for functional annotation
Source: Springer Nature journal article supplement (doi:10.1186/1471-2105-11-589), 2010-12-01

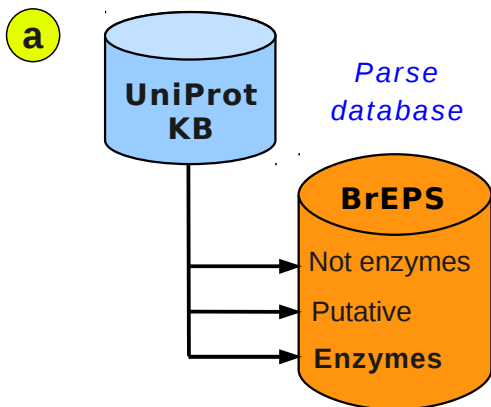

**b**

BLAST

|   | 1                 | 2                 | 3                 | 4                 | 5                 | 6                 |
|---|-------------------|-------------------|-------------------|-------------------|-------------------|-------------------|
| 1 | 0                 | 10 <sup>-85</sup> | 10 <sup>-43</sup> | 10 <sup>-29</sup> | 10 <sup>-29</sup> | 10 <sup>-13</sup> |
| 2 | 10 <sup>-85</sup> | 0                 | 10 <sup>-44</sup> | 10 <sup>-30</sup> | 10 <sup>-30</sup> | 10 <sup>-13</sup> |
| 3 | 10 <sup>-43</sup> | 10 <sup>-44</sup> | 0                 | 10 <sup>-39</sup> | 10 <sup>-30</sup> | 10 <sup>-10</sup> |
| 4 | 10 <sup>-29</sup> | 10 <sup>-30</sup> | 10 <sup>-39</sup> | 0                 | 10 <sup>-44</sup> | 10 <sup>-17</sup> |
| 5 | 10 <sup>-29</sup> | 10 <sup>-30</sup> | 10 <sup>-30</sup> | 10 <sup>-44</sup> | 0                 | 10 <sup>-11</sup> |
| 6 | 10 <sup>-13</sup> | 10 <sup>-13</sup> | 10 <sup>-10</sup> | 10 <sup>-17</sup> | 10 <sup>-11</sup> | 0                 |
|   | P08632            | P28266            | P77791            | P07464            | P52984            | Q58464            |

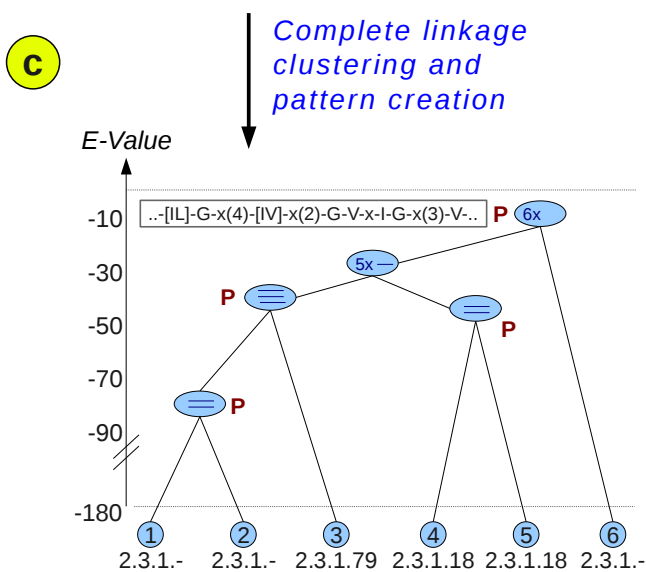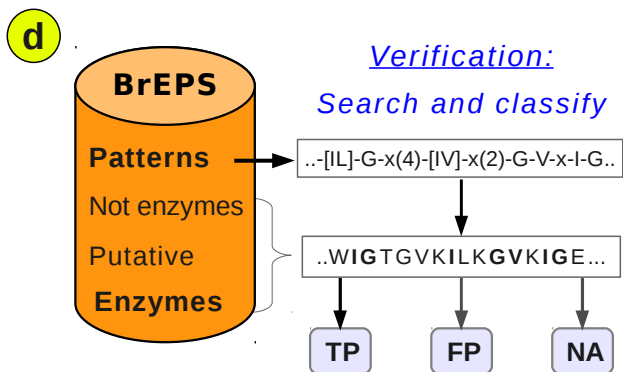

Supplement: 12859_2010_4172_MOESM2_ESM.pdf [file 12859_2010_4172_MOESM2_ESM.pdf]
