# Supplementary material for: BrEPS: a flexible and automatic protocol to compute enzyme-specific sequence profiles for functional annotation
Source: Springer Nature journal article supplement (doi:10.1186/1471-2105-11-589), 2010-12-01

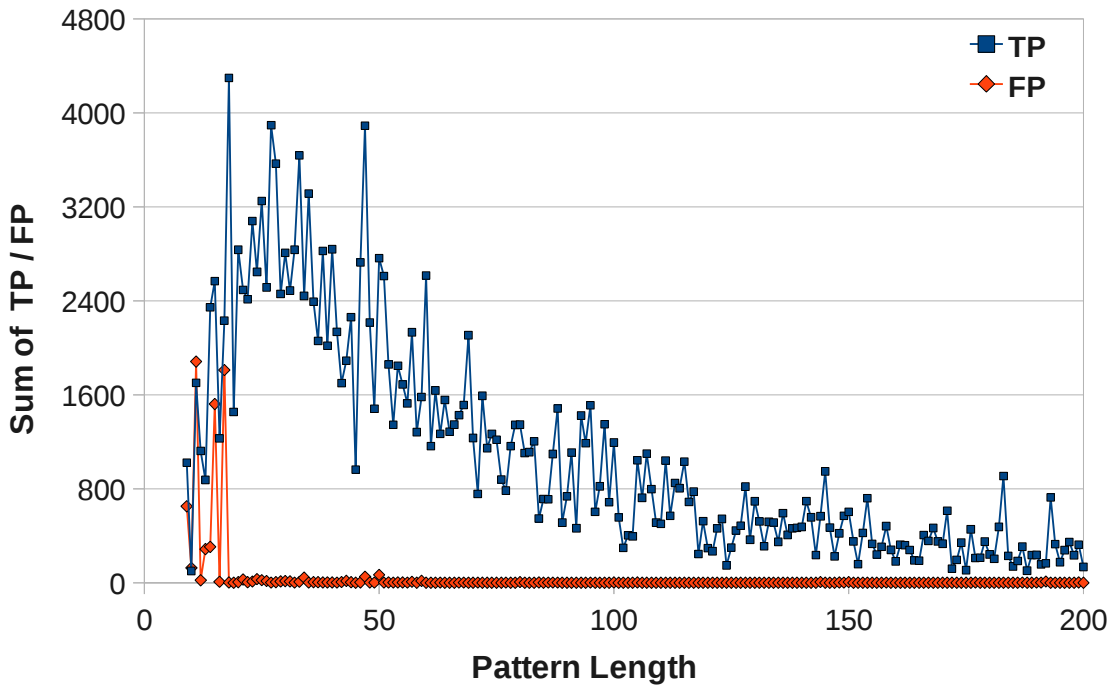

Supplement: 12859_2010_4172_MOESM3_ESM.pdf [file 12859_2010_4172_MOESM3_ESM.pdf]
